# Supplementary material
Source: PubMed Central journal article supplement (PMC506826)
Supplement: nar_32_13_e107__1.pdf [file nar_32_13_e107__1.pdf]

Supplementary data

Oligonucleotide MALDI-TOFMS data

| Endcapped DNA duplexes | (M+H) <sup>+</sup> Calculated | (M+H) <sup>+</sup> Observed |
|------------------------|-------------------------------|-----------------------------|
| <b>I</b>               | 9273.96                       | 9281.90                     |
| <b>II</b>              | 7435.77                       | 7432.68                     |
| <b>III</b>             | 7435.77                       | 7429.10                     |
| <b>IV</b>              | 5577.84                       | 5571.62                     |
| <b>V</b>               | 5583.54                       | 5580.21                     |
